# Supplementary material for: The first stereochemically nonrigid monomeric two-coordinate copper(i) complexes with homoleptic and heteroleptic “N2” donor set
Source: Royal Society of Chemistry journal article supplement (doi:10.1039/b802095g), 2008-01-01
Supplement: b802095g.pdf [file b802095g.pdf]

## Supporting Information

for

**The first stereochemically nonrigid monomeric  
two-coordinate copper(I) complexes with homoleptic  
and heteroleptic "N<sub>2</sub>" donor set**

Chang-Chuan Chou,\* Hsueh-Ju Liu , and Chan-Cheng Su

### Contents

1. Figure S1. <sup>1</sup>H NMR spectra of complex **1** in toluene-*d*<sub>8</sub>
2. Figure S2. <sup>1</sup>H NMR spectra of complex **1** in CD<sub>2</sub>Cl<sub>2</sub>
3. Figure S3. <sup>1</sup>H NMR spectra of complex **2** in CD<sub>2</sub>Cl<sub>2</sub>
4. Figure S4. <sup>1</sup>H NMR spectra of complex **3** in CD<sub>2</sub>Cl<sub>2</sub>

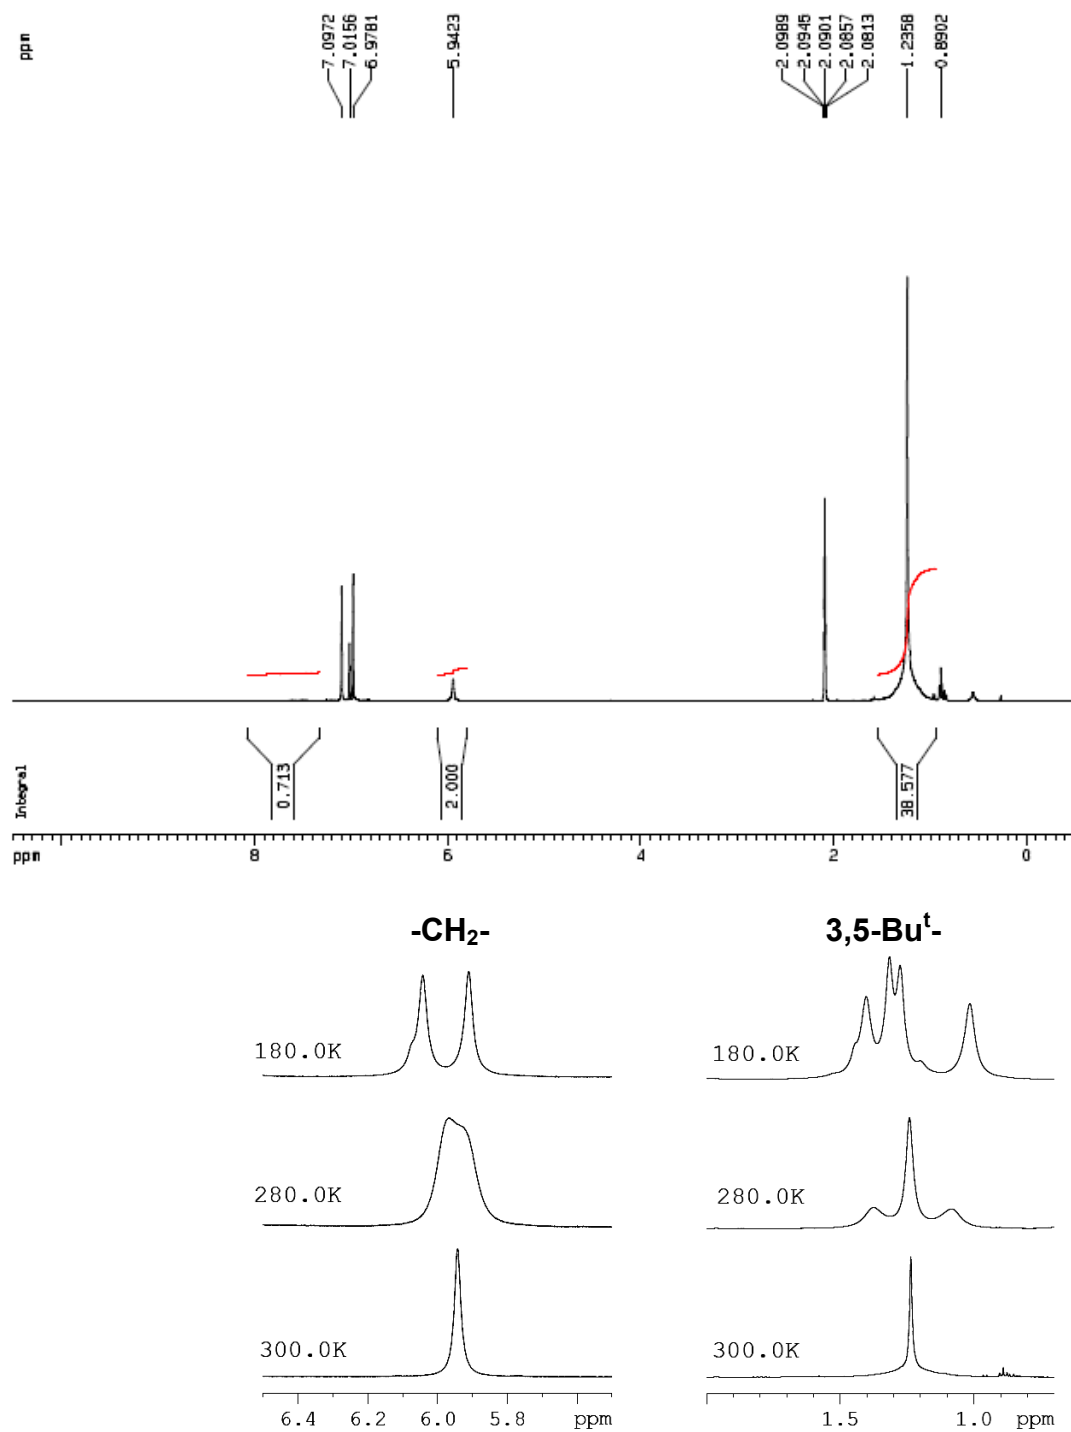

Figure S1.  $^1\text{H}$  NMR spectra of complex 1 in  $\text{toluene-d}_8$ .

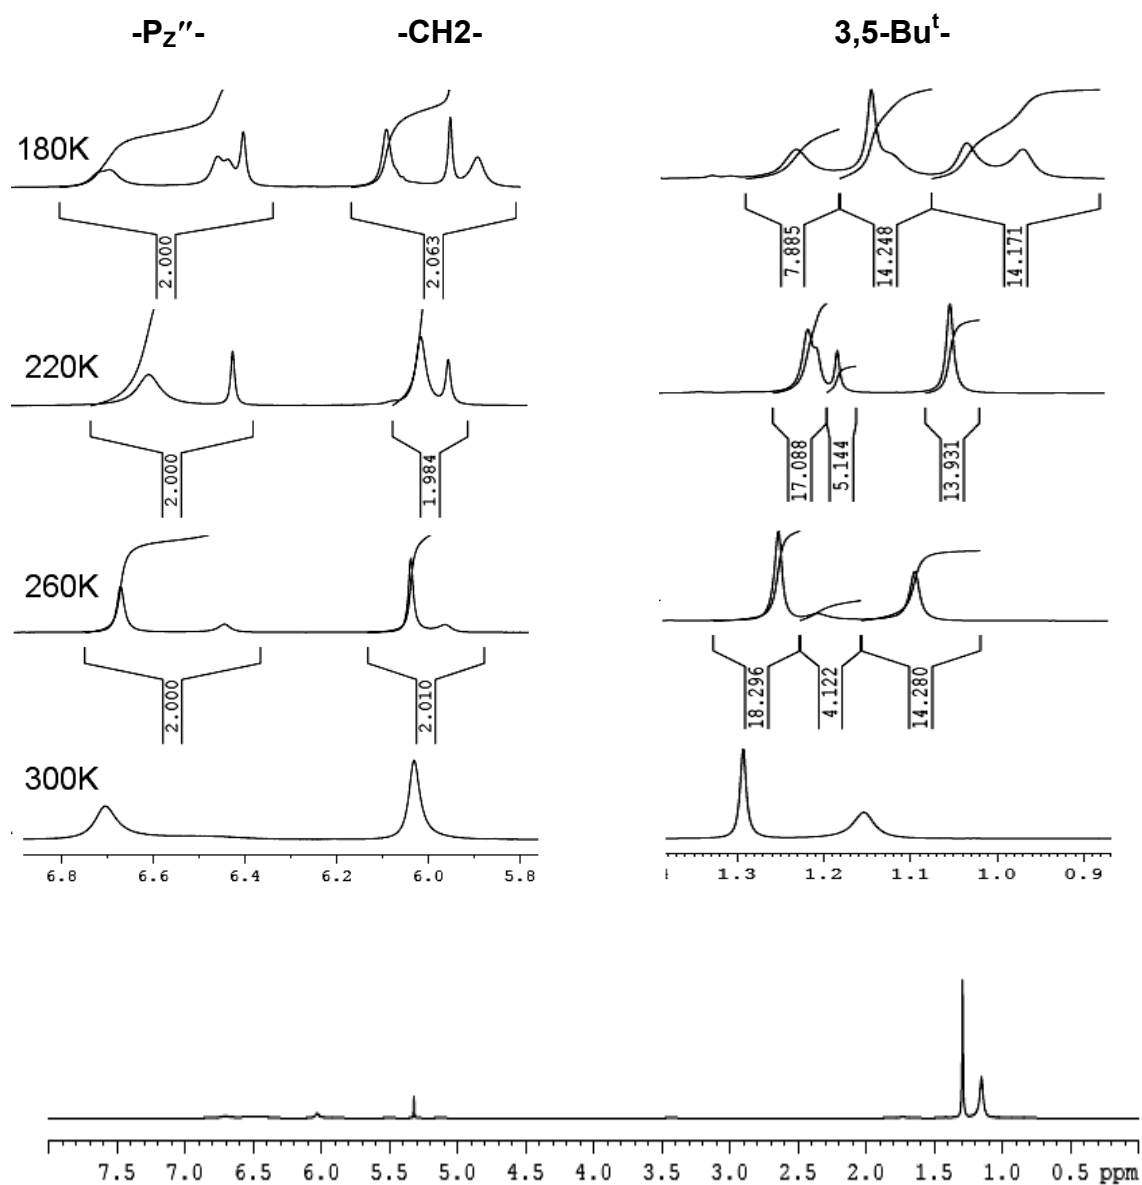

Figure S2.  $^1\text{H}$  NMR spectra of complex 1 in  $\text{CD}_2\text{Cl}_2$ .

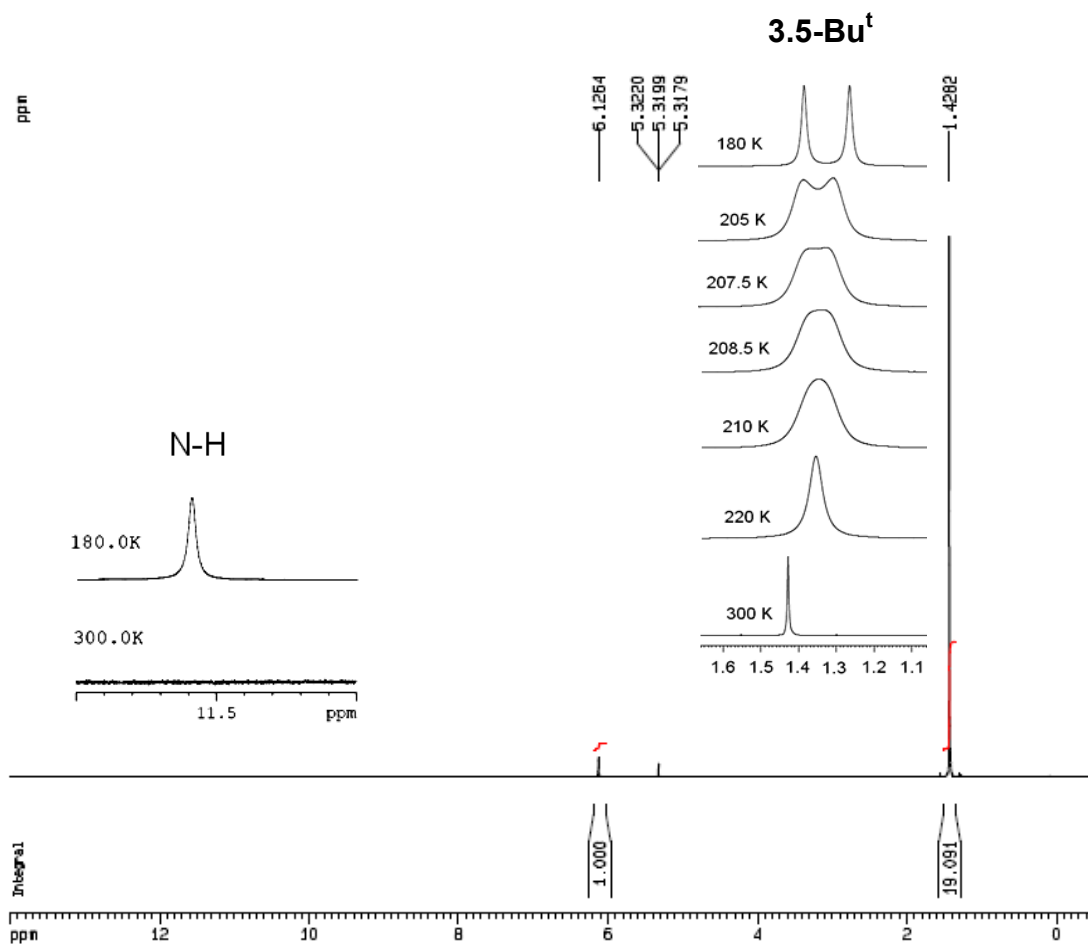

**Figure S3.**  $^1\text{H}$  NMR spectra of complex **2** in  $\text{CD}_2\text{Cl}_2$ .

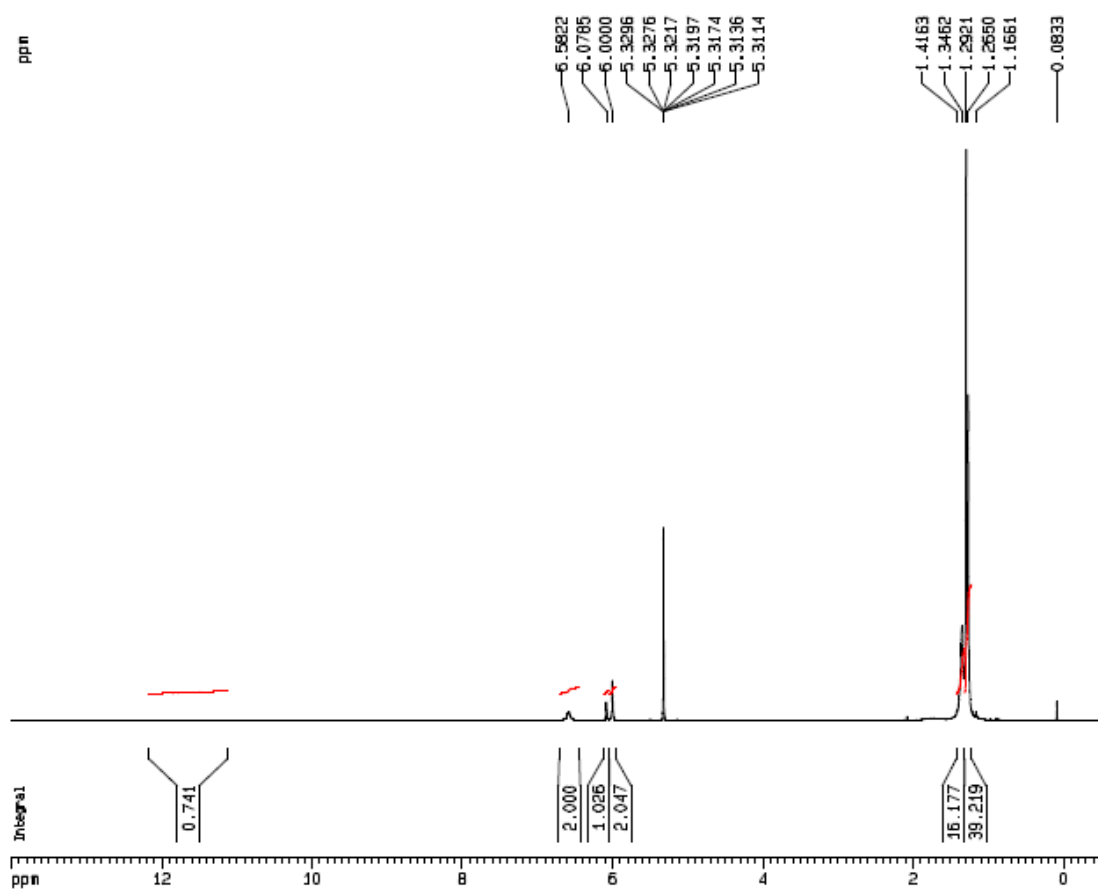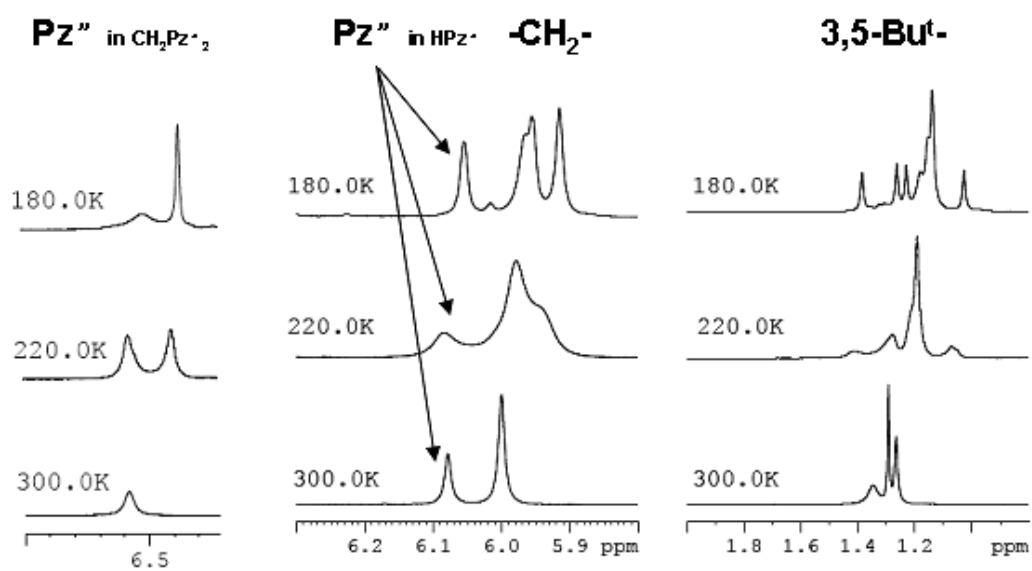

Figure S4.  $^1\text{H}$  NMR spectra of complex 3 in  $\text{CD}_2\text{Cl}_2$ .
